# Supplementary material
Source: PubMed Central journal article supplement (PMC8669280)

Supplementary Material: Evaluation of Single Bolus, Dual-Echo Dynamic Susceptibility Contrast MRI Protocols in Brain Tumor Patients

Supporting Table S1: Subject characteristics for each group.

| GROUP <sup>a</sup> | N  | AGE (YEARS) <sup>b</sup> | SEX (M/F) | TUMOR TYPES (N) |            |            |       | ENHANCING |    |
|--------------------|----|--------------------------|-----------|-----------------|------------|------------|-------|-----------|----|
|                    |    |                          |           | Glial           | Meningioma | Metastatic | Mixed | Yes       | No |
| ALL                | 59 | 51.3 (13.7)              | 31 / 28   | 51              | 2          | 5          | 1     | 51        | 8  |
| BASIC              | 15 | 55.3 (12.5)              | 7 / 8     | 10              | 1          | 3          | 1     | 13        | 2  |
| ½-DOSE             | 10 | 49.5 (12.3)              | 4 / 6     | 10              | 0          | 0          | 0     | 8         | 2  |
| LOW FA             | 16 | 49.2 (17.1)              | 7 / 9     | 15              | 1          | 0          | 0     | 12        | 4  |
| SHORT TR           | 18 | 50.8 (12.4)              | 13 / 5    | 16              | 0          | 2          | 0     | 18        | 0  |

<sup>a</sup>Groups are defined based on the dual-echo protocol, see Table 1. <sup>b</sup>Mean (standard deviation).

Figure S1: T<sub>1</sub>-weighted post-contrast image, dual-echo and single-echo rCBF maps, and voxel-wise correlation plots for representative cases from each protocol. The correlation plots show the line of unity (dashed) and the best-fit line from Deming regression (solid line). The Pearson's *r* value and CCC are shown for each plot. All tumors shown are high-grade gliomas.

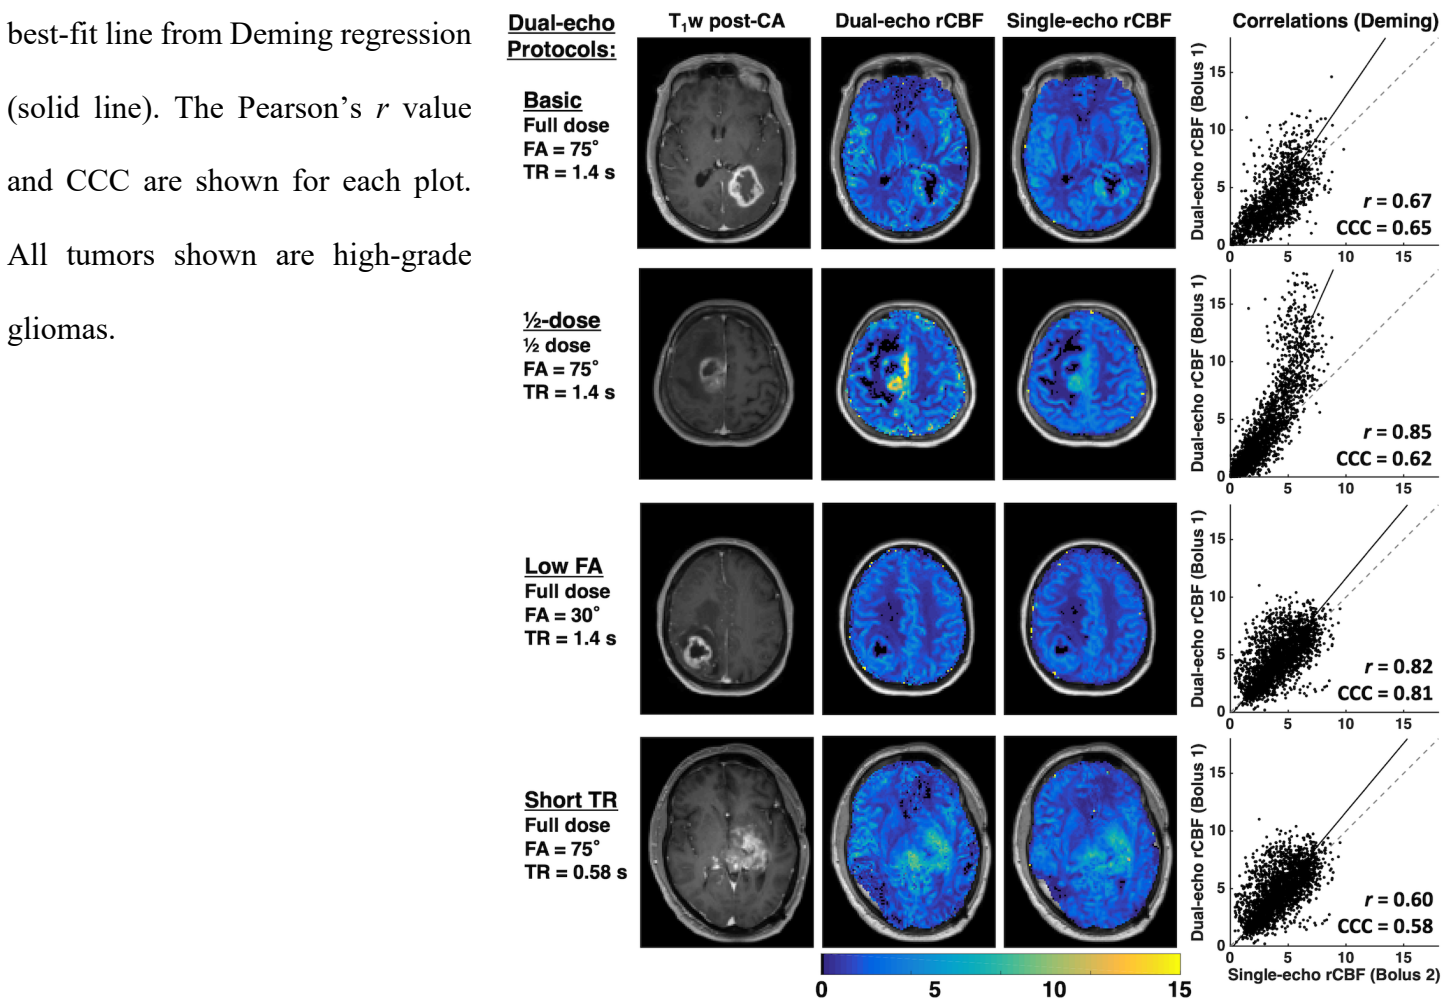

Supplement: sj-pdf-1-jcb-10.1177_0271678X211039597.pdf [file sj-pdf-1-jcb-10.1177_0271678X211039597.pdf]
